# Supplementary material for: Ubiquitin C-terminal hydrolase37 regulates Tcf7 DNA binding for the activation of Wnt signalling
Source: PubMed Central journal article supplement (PMC5309806; doi:10.1038/srep42590), 2017-02-15
Supplement: srep42590-s1.pdf [file srep42590-s1.pdf]

# Supplementary Information

12 Supplementary figures with legends and 5 Supplementary tables

## Ubiquitin C-terminal hydrolase37 regulates Tcf7 DNA binding for the activation of Wnt signalling

Wonhee Han<sup>1</sup>, Hyeyoon Lee<sup>1</sup> and Jin-Kwan Han<sup>1\*</sup>

<sup>1</sup>Department of Life Sciences, Pohang University of Science and Technology, 77 Cheongam-Ro, Nam-Gu, Pohang, Gyeongbuk, 37673, Korea

\* Author for correspondence ([jkh@postech.ac.kr](mailto:jkh@postech.ac.kr))

# Figure S1

|                 |     |                                                                |
|-----------------|-----|----------------------------------------------------------------|
| Human           | 1   | MTGNAGEWCLMESDPGVFTELIKFGGCRGAQVEE IWSLEPEN FEKLKPVHGLIFLFWQF  |
| Mouse           | 1   | MSGNAGEWCLMESDPGVFTELIKFGGCRGAQVEE IWSLEPESE FEKLKPVHGLIFLFWQF |
| <i>X.laevis</i> | 1   | MAGSAGEWCLMESDPGVFTELIKFGGCRGQVEE IWSLEQEH FVDLQPVQGLIFLFWQF   |
|                 |     |                                                                |
| Human           | 61  | GEEPAGSVVQDSRLDTIFFAKQVINNACATQAIIVSVLLNCTHQDVHLGETLSEFKEF     |
| Mouse           | 61  | GEEPAGSVVQDSRLDTIFFAKQVINNACATQAIIVSVLLNCTHQDVHLGETLSEFKEF     |
| <i>X.laevis</i> | 61  | GEEPAGSVVQDSRLDTIFFAKQVINNACATQAIISILLNTHNDVHLGETLSEFKEF       |
|                 |     |                                                                |
| Human           | 118 | SQSFDAAMKGLALSNSDVIRQVHNSFARQQMFEDTKTSAKEEDAFHFVSYVPVNG        |
| Mouse           | 118 | SQSFDAAMKGLALSNSDVIRQVHNSFARQQMFEDTKTSAKEEDAFHFVSYVPVNG        |
| <i>X.laevis</i> | 118 | TQSFDAAMKGLALSNSDVIRQVHNSFARQQMFEDAKSTTKDDDAFHFVSYVPVNG        |
|                 |     |                                                                |
| Human           | 174 | RLYELDGLREGPIDLGACNODDWISAVRPVIEKRIQKYSEGEIRFNLMAIVSDRKM       |
| Mouse           | 174 | RLYELDGLREGPIDLGACNODDWISAVRPVIEKRIQKYSEGEIRFNLMAIVSDRKM       |
| <i>X.laevis</i> | 174 | RLYELDGLKDGPIDLGPCKEDDWISAAAPRVIEKRMQKYCEGEIRFNLMAIVSDRKK      |
|                 |     |                                                                |
| Human           | 230 | IYEQKIAELQRQLAEEEEPMDTDQGNLSLSAIOSEVAKNOMLIEEEVQKLRKYKIEN      |
| Mouse           | 230 | IYEQKIAELQRQLAEEEEPMDTDQGSTVLSAIOSEVARNOMLIEEEVQKLRKYKIEN      |
| <i>X.laevis</i> | 230 | IYEQKIADLQRRITAEEEPMDTDQGSTLLSSMQSEIAKYQLLIEEEKQKMKRYKVEN      |
|                 |     |                                                                |
| Human           | 286 | IRRKHNYLPPFIMELLKTLAEHQQLIPLVEKAKEKQNAKKAQETK                  |
| Mouse           | 285 | IRRKHNYLPPFIMELLKTLAEHQQLIPLVEKAKEKQNAKKAQETK                  |
| <i>X.laevis</i> | 286 | IRRKHNYLPPFIMELLKTLAEHQQLIPLVEKAKEKHNTERRAQEAAR                |

**Figure S2**

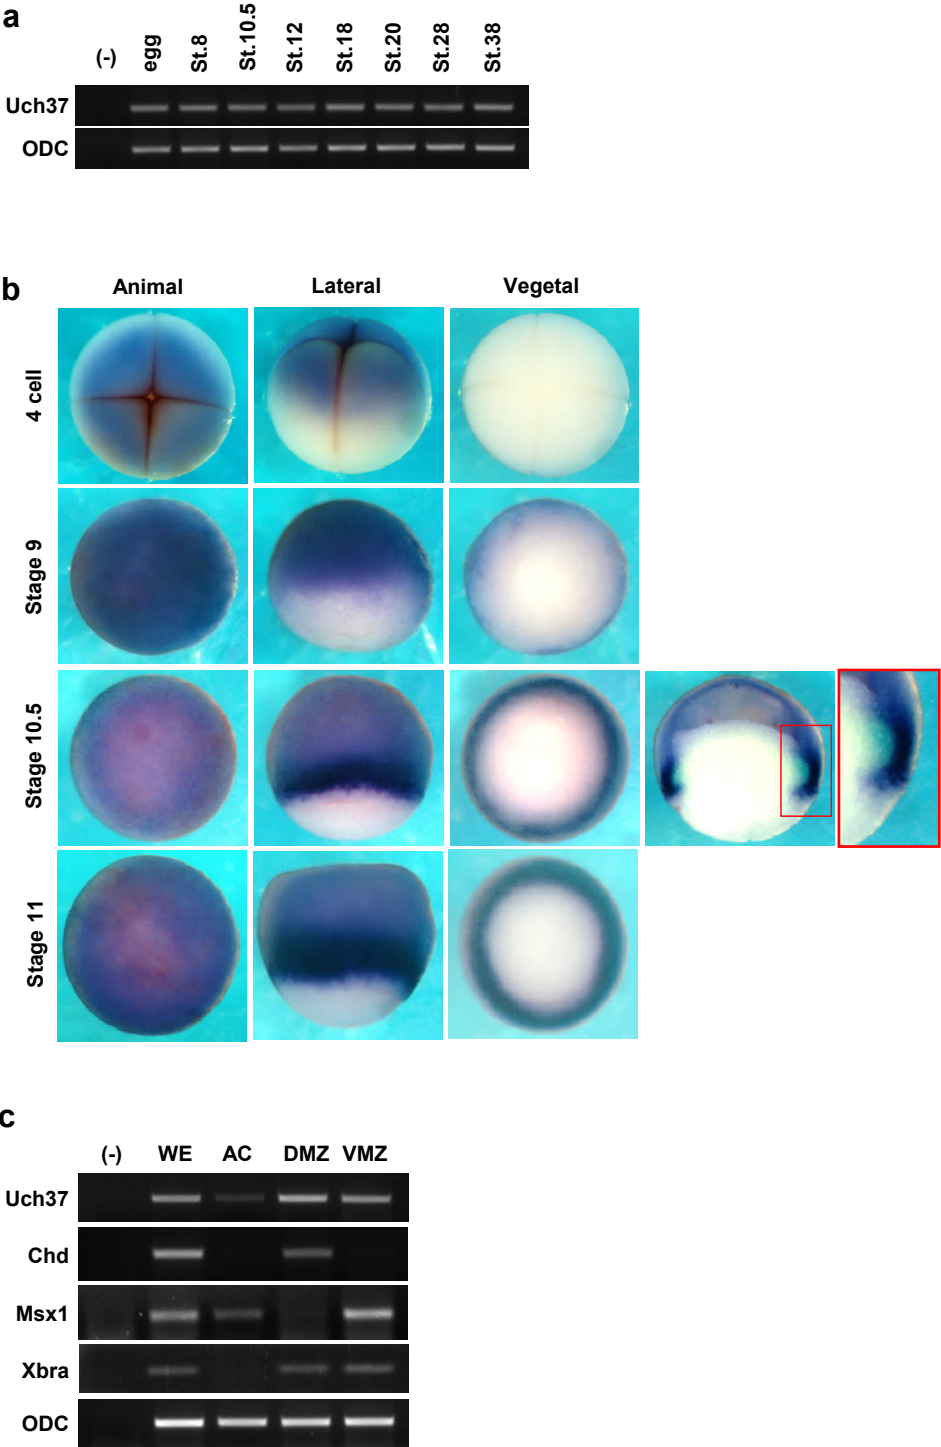

# Figure S3

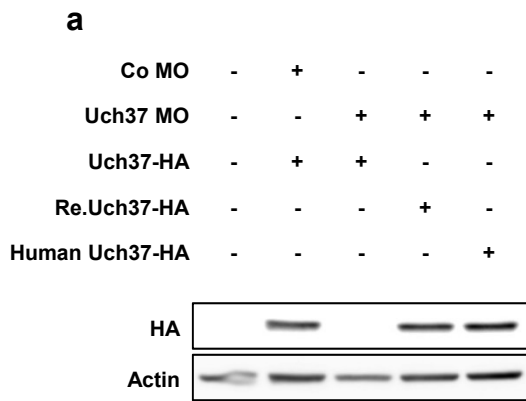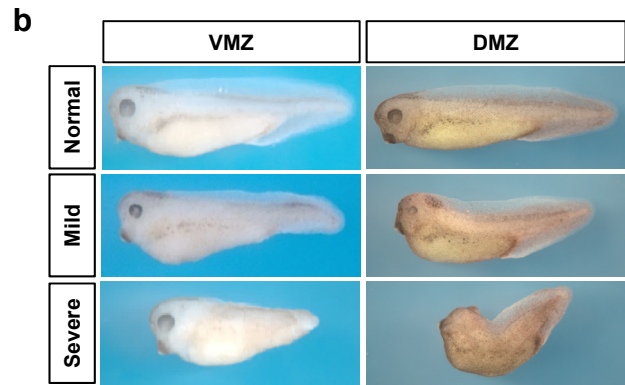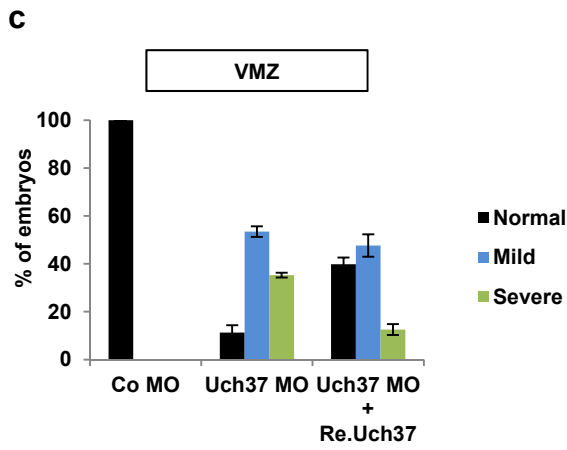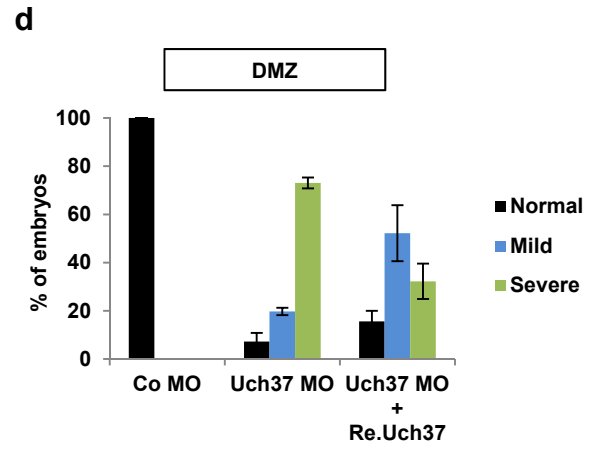

# Figure S4

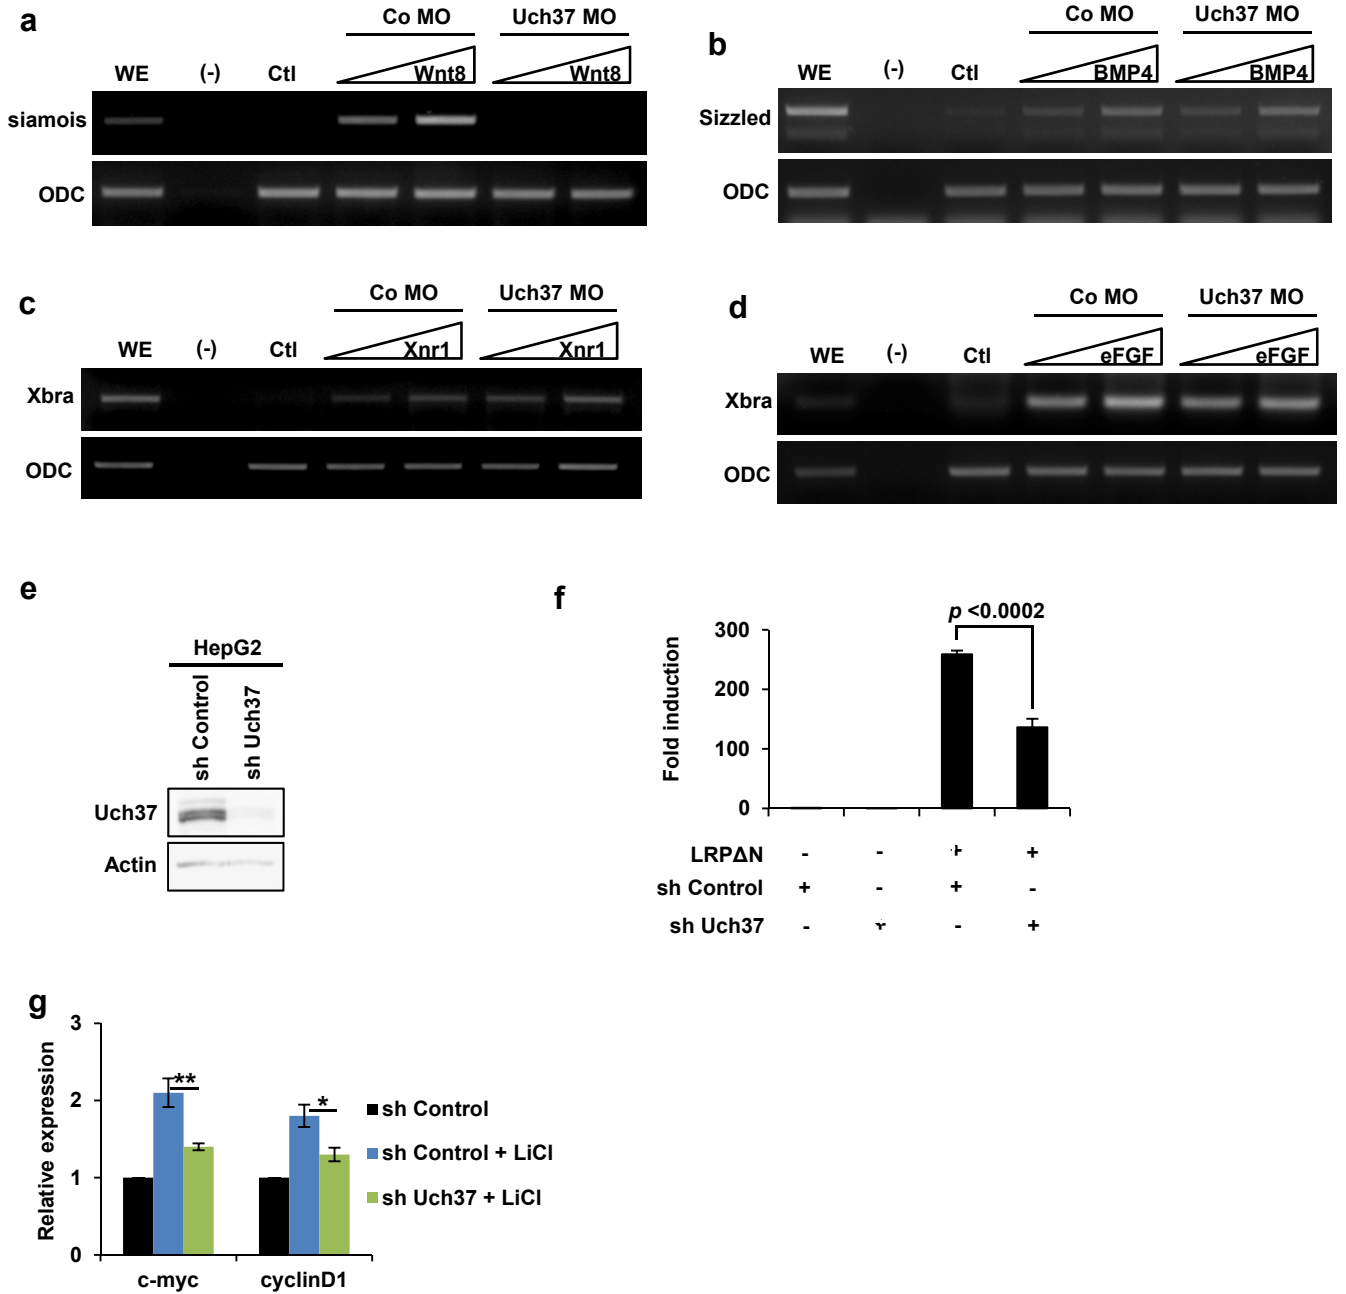

# Figure S5

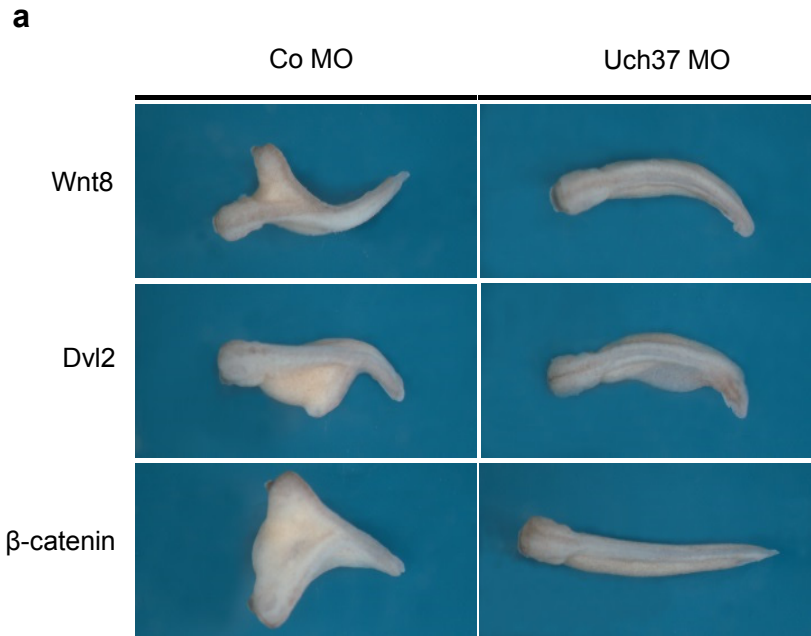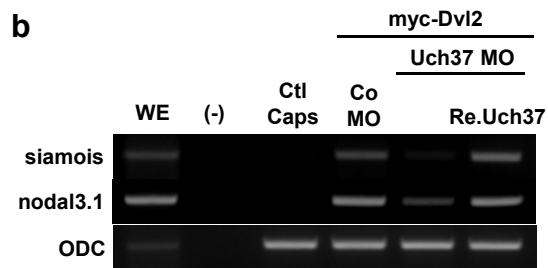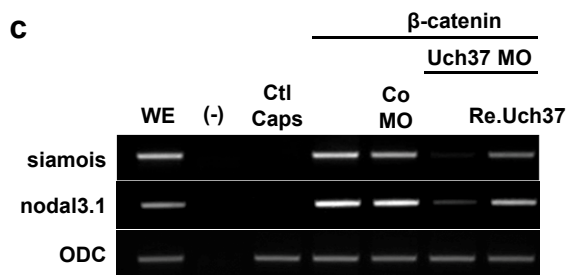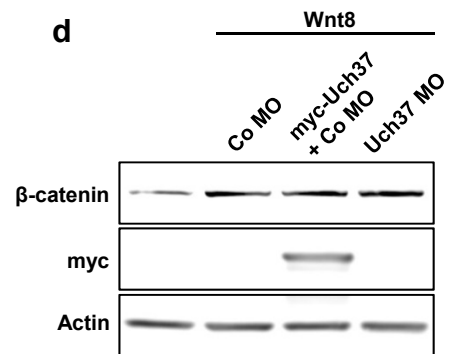

# Figure S6

**a**

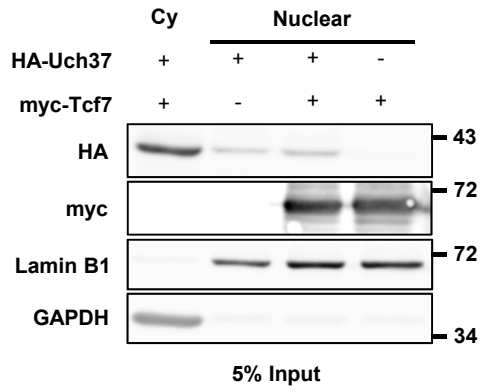

**b**

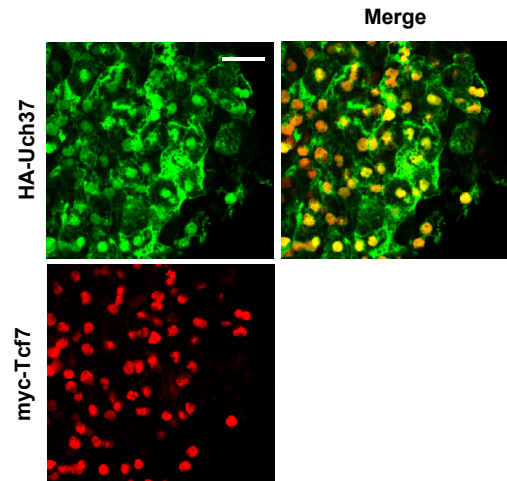

**c**

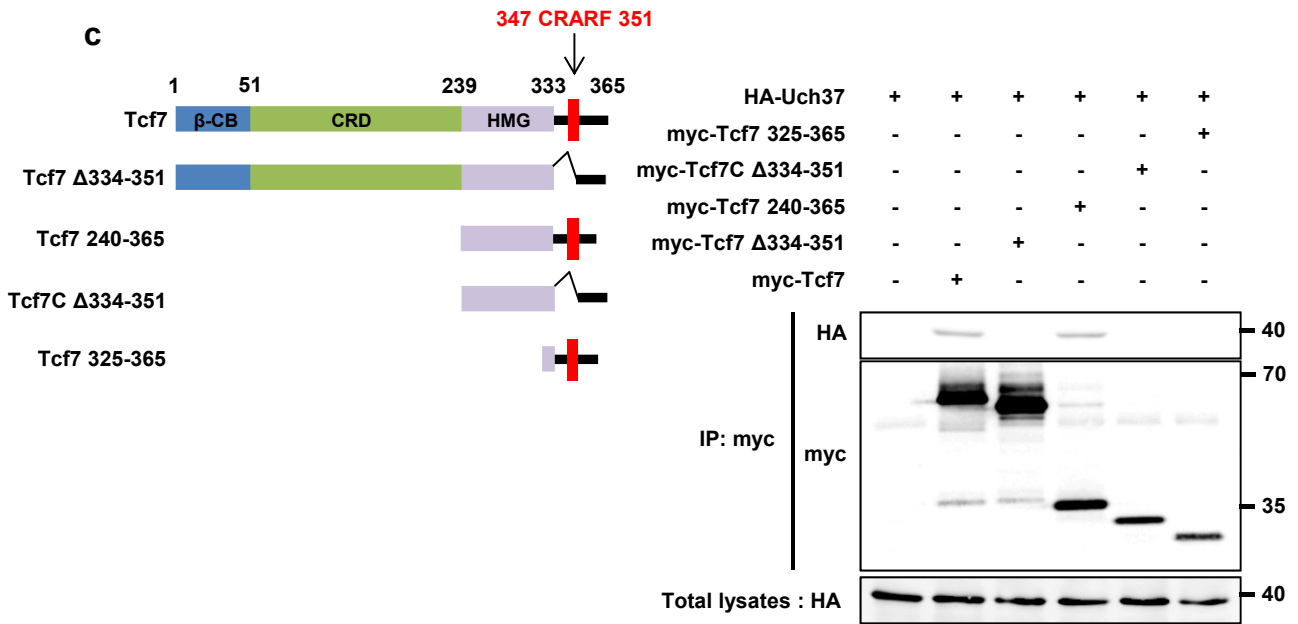

# Figure S7

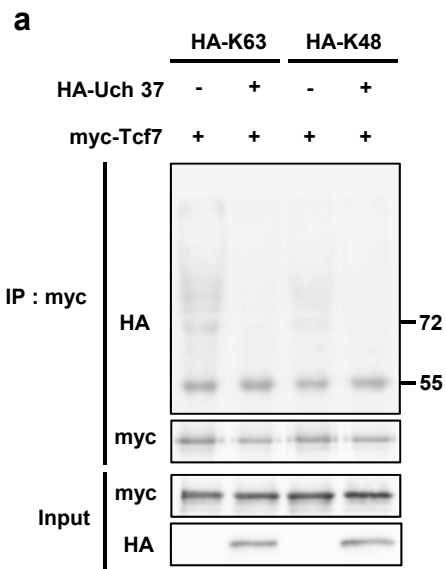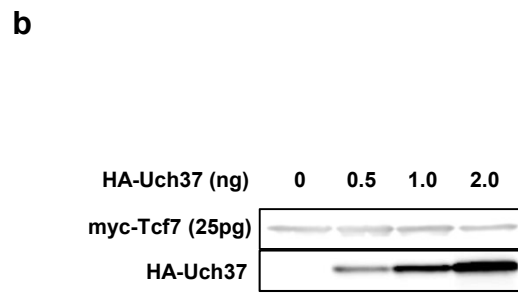



# Figure S8

**a**

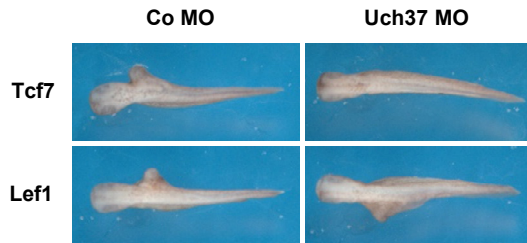

**b**

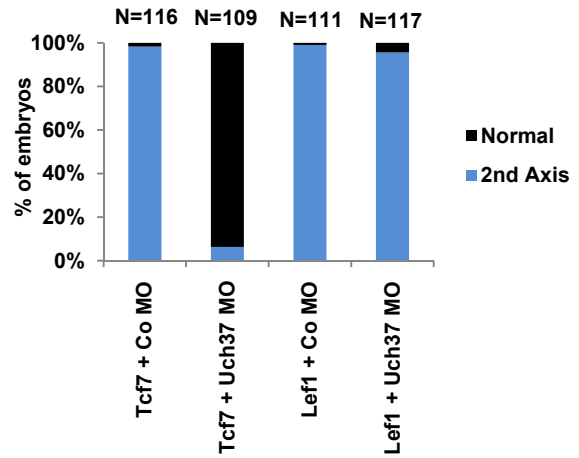

**c**

|          |   |   |   |   |   |
|----------|---|---|---|---|---|
| Uch37 IN | - | - | - | - | + |
| Uch37 WT | - | - | - | + | - |
| myc-Tcf7 | - | + | + | + | + |
| Co MO    | + | + | - | - | - |
| Uch37 MO | - | - | + | + | + |

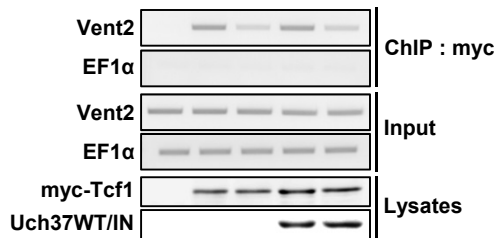

# Figure S9

## Figure 2a

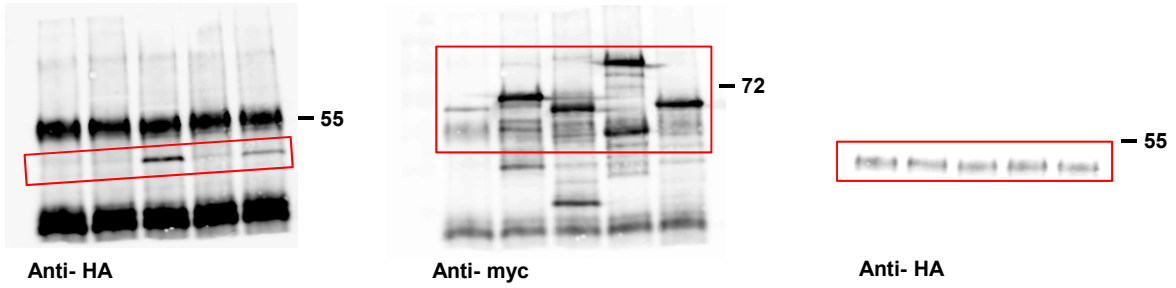

## Figure 2b

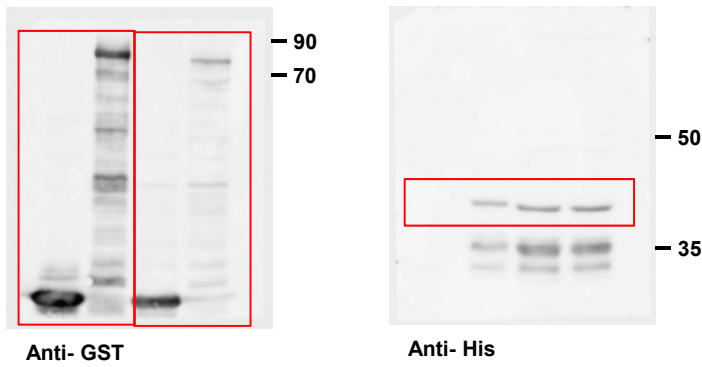

## Figure 2c

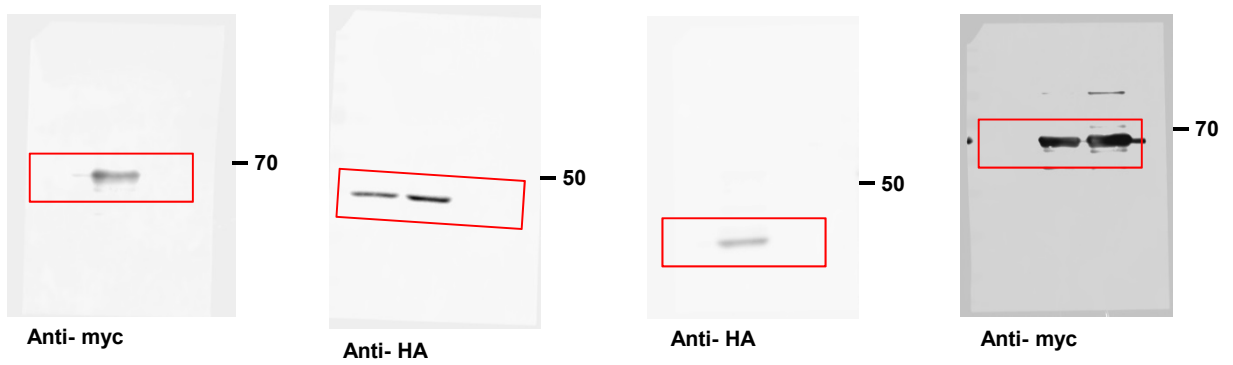

## Figure 2d

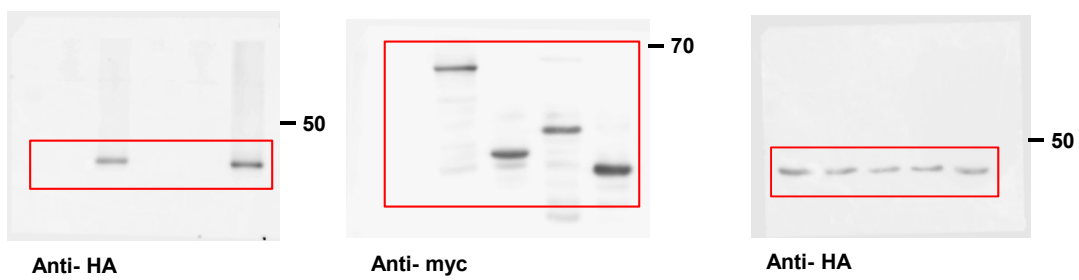

# Figure S10

## Figure 3a

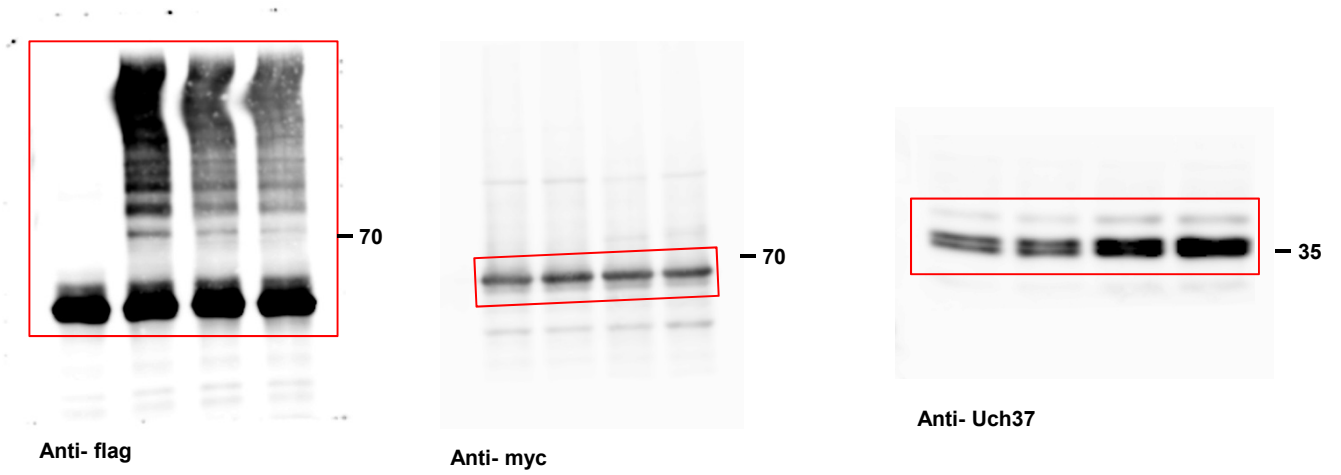

## Figure 3b

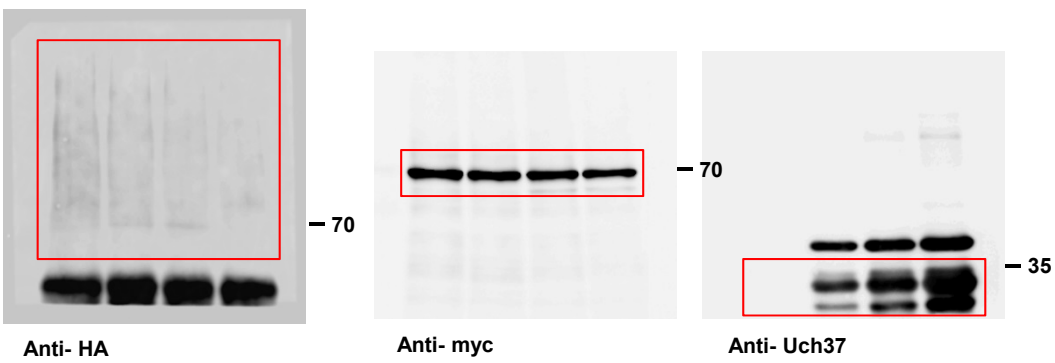

## Figure 3c

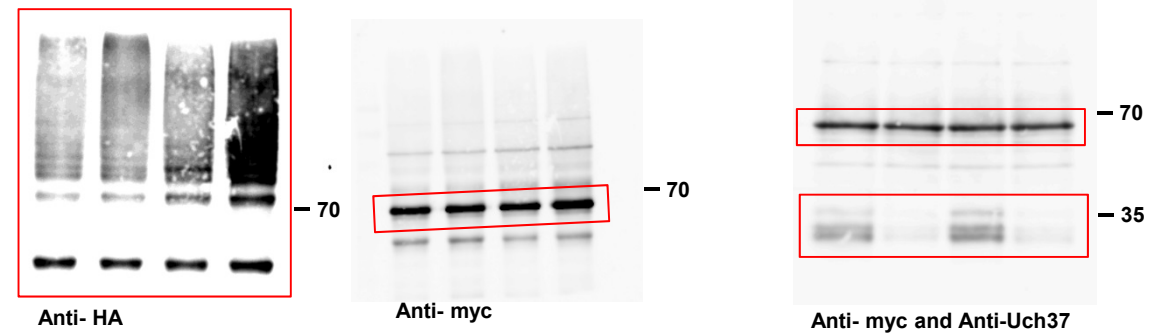

# Figure S11

## Figure 3e

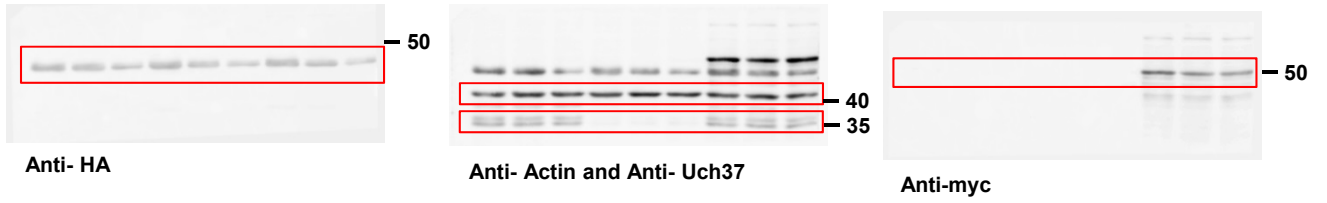

## Figure 4d

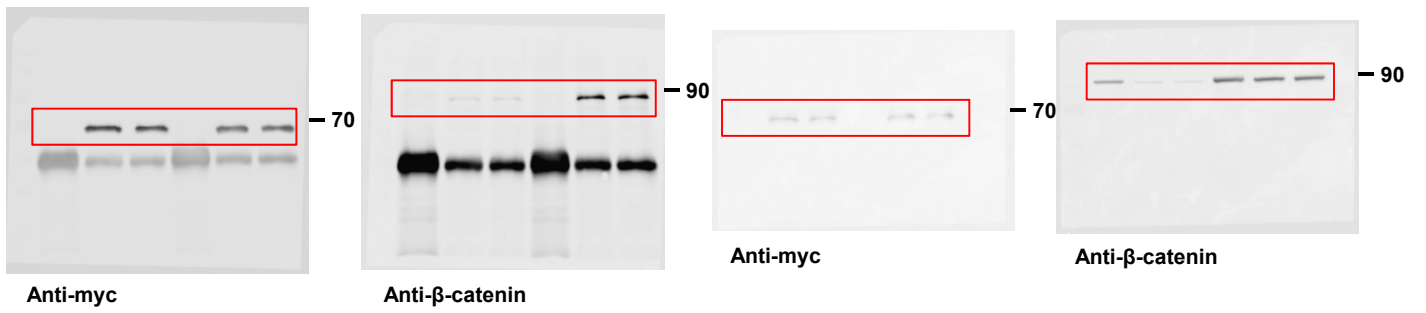

## Figure 4e

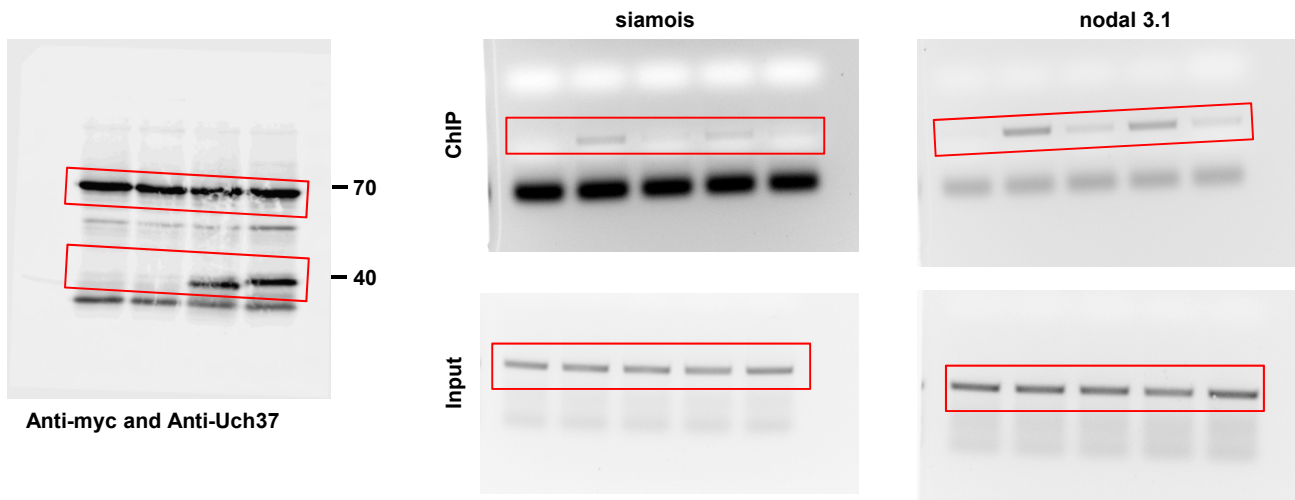

# Figure S12

## Figure 1b

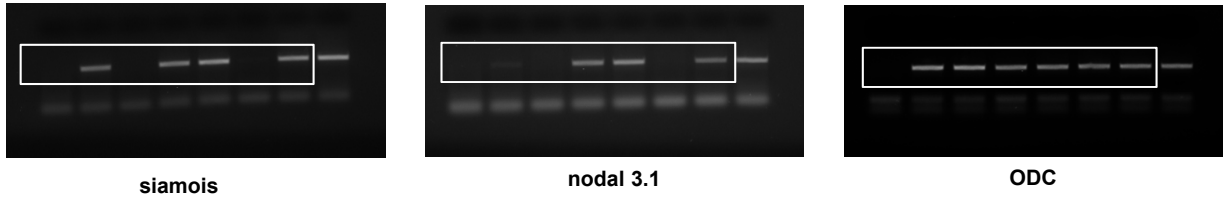

## Figure 4a

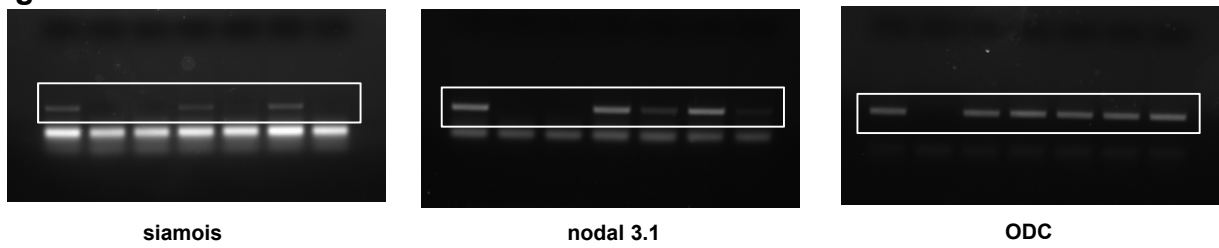

## Figure 6c

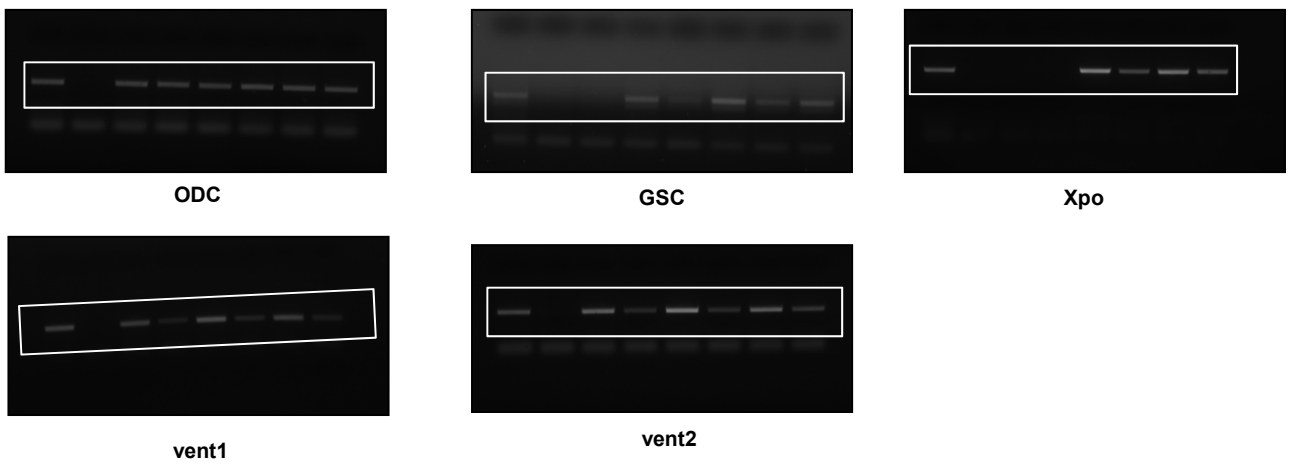

**Table S1. Knockdown analysis (Supplementary Fig. S3b-d)**

| VMZ    | 1 <sup>st</sup> |          |                     | 2 <sup>nd</sup> |          |                     | 3 <sup>rd</sup> |          |                     |
|--------|-----------------|----------|---------------------|-----------------|----------|---------------------|-----------------|----------|---------------------|
|        | Co MO           | Uch37 MO | Uch37 MO + Re.Uch37 | Co MO           | Uch37 MO | Uch37 MO + Re.Uch37 | Co MO           | Uch37 MO | Uch37 MO + Re.Uch37 |
| N      | 37              | 42       | 39                  | 42              | 36       | 29                  | 35              | 33       | 41                  |
| Normal | 37              | 7        | 16                  | 42              | 4        | 10                  | 35              | 2        | 18                  |
| Mild   | 0               | 21       | 19                  | 0               | 19       | 16                  | 0               | 19       | 16                  |
| Severe | 0               | 14       | 4                   | 0               | 13       | 3                   | 0               | 12       | 7                   |

| DMZ    | 1 <sup>st</sup> |          |                     | 2 <sup>nd</sup> |          |                     | 3 <sup>rd</sup> |          |                     |
|--------|-----------------|----------|---------------------|-----------------|----------|---------------------|-----------------|----------|---------------------|
|        | Co MO           | Uch37 MO | Uch37 MO + Re.Uch37 | Co MO           | Uch37 MO | Uch37 MO + Re.Uch37 | Co MO           | Uch37 MO | Uch37 MO + Re.Uch37 |
| N      | 45              | 35       | 32                  | 50              | 40       | 33                  | 40              | 41       | 30                  |
| Normal | 45              | 5        | 4                   | 50              | 1        | 8                   | 40              | 2        | 3                   |
| Mild   | 0               | 6        | 18                  | 0               | 9        | 10                  | 0               | 8        | 21                  |
| Severe | 0               | 24       | 10                  | 0               | 30       | 15                  | 0               | 31       | 6                   |

**Table S2. Axis duplication assay (Fig. 1c, d)**

|                | 1 <sup>st</sup> |         |          | 2 <sup>nd</sup> |         |          | 3 <sup>rd</sup> |         |          |
|----------------|-----------------|---------|----------|-----------------|---------|----------|-----------------|---------|----------|
|                | Normal          | Partial | Complete | Normal          | Partial | Complete | Normal          | Partial | Complete |
| Uninjected     | 40              | 0       | 0        | 36              | 0       | 0        | 60              | 0       | 0        |
| Wnt8           | 2               | 32      | 0        | 3               | 37      | 0        | 10              | 30      | 0        |
| Wnt8 + Uch37   | 2               | 2       | 34       | 0               | 5       | 27       | 1               | 0       | 48       |
| Wnt8 + Uch37MO | 40              | 0       | 0        | 38              | 0       | 0        | 54              | 0       | 0        |

**Table S3. Axis duplication assay (Fig. 1g)**

|                  | 1 <sup>st</sup>      |        | 2 <sup>nd</sup>      |        | 3 <sup>rd</sup>      |        |    |
|------------------|----------------------|--------|----------------------|--------|----------------------|--------|----|
|                  | 2 <sup>nd</sup> Axis | Normal | 2 <sup>nd</sup> Axis | Normal | 2 <sup>nd</sup> Axis | Normal |    |
| Wnt8             | Co MO                | 35     | 4                    | 30     | 0                    | 40     | 0  |
|                  | Uch37 MO             | 0      | 33                   | 1      | 34                   | 0      | 37 |
| Dvl2             | Co MO                | 29     | 0                    | 37     | 2                    | 40     | 0  |
|                  | Uch37 MO             | 3      | 34                   | 6      | 29                   | 4      | 36 |
| $\beta$ -catenin | Co MO                | 28     | 0                    | 35     | 0                    | 40     | 0  |
|                  | Uch37 MO             | 5      | 32                   | 4      | 28                   | 9      | 31 |

**Table S4. Reduced ventrolateral mesoderm genes following depletion of Uch37 (Fig. 5a ).**

|              | 1 <sup>st</sup> |          |                     |                 | 2 <sup>nd</sup> |          |                     |                 | 3 <sup>rd</sup> |          |                     |                 |       |          |                     |                 |    |
|--------------|-----------------|----------|---------------------|-----------------|-----------------|----------|---------------------|-----------------|-----------------|----------|---------------------|-----------------|-------|----------|---------------------|-----------------|----|
|              | Co MO           | Uch37 MO | Uch37 MO + Re.Uch37 | Uch37 MO + Lef1 | Co MO           | Uch37 MO | Uch37 MO + Re.Uch37 | Uch37 MO + Lef1 | Co MO           | Uch37 MO | Uch37 MO + Re.Uch37 | Uch37 MO + Lef1 | Co MO | Uch37 MO | Uch37 MO + Re.Uch37 | Uch37 MO + Lef1 |    |
|              |                 |          |                     |                 |                 |          |                     |                 |                 |          |                     |                 |       |          |                     |                 |    |
| <b>MyoD</b>  |                 |          |                     |                 |                 |          |                     |                 |                 |          |                     |                 |       |          |                     |                 |    |
| N            | 40              | 30       | 35                  | 37              | 40              | 36       | 34                  | 39              | 37              | 39       | 35                  | 32              | 37    | 39       | 35                  | 32              | 32 |
| Normal       | 40              | 6        | 23                  | 25              | 40              | 2        | 18                  | 23              | 40              | 7        | 13                  | 15              | 37    | 7        | 13                  | 15              | 15 |
| Reduced      | 0               | 24       | 12                  | 12              | 0               | 34       | 16                  | 16              | 0               | 32       | 22                  | 17              | 0     | 32       | 22                  | 17              | 17 |
| <b>Xpo</b>   |                 |          |                     |                 |                 |          |                     |                 |                 |          |                     |                 |       |          |                     |                 |    |
| N            | 37              | 41       | 42                  | 39              | 41              | 38       | 36                  | 34              | 35              | 37       | 38                  | 35              | 35    | 37       | 38                  | 35              | 35 |
| Normal       | 37              | 5        | 24                  | 25              | 41              | 6        | 22                  | 19              | 35              | 3        | 18                  | 21              | 35    | 3        | 18                  | 21              | 21 |
| Reduced      | 0               | 36       | 18                  | 14              | 0               | 32       | 14                  | 15              | 0               | 34       | 20                  | 14              | 0     | 34       | 20                  | 14              | 14 |
| <b>Vent1</b> |                 |          |                     |                 |                 |          |                     |                 |                 |          |                     |                 |       |          |                     |                 |    |
| N            | 38              | 32       | 33                  | 37              | 35              | 42       | 39                  | 38              | 40              | 37       | 39                  | 38              | 40    | 37       | 39                  | 38              | 38 |
| Normal       | 38              | 6        | 17                  | 19              | 35              | 4        | 20                  | 22              | 40              | 8        | 20                  | 24              | 40    | 8        | 20                  | 24              | 24 |
| Reduced      | 0               | 26       | 16                  | 18              | 0               | 38       | 19                  | 16              | 0               | 29       | 19                  | 14              | 0     | 29       | 19                  | 14              | 14 |



**Table S5. Uch37 MO inhibited promotion of the ventrolateral mesoderm genes by Wnt8 (Fig. 5b).**

| Vent1    | 1 <sup>st</sup> |                    |                       | 2 <sup>nd</sup> |                    |                       | 3 <sup>rd</sup> |                    |                       |
|----------|-----------------|--------------------|-----------------------|-----------------|--------------------|-----------------------|-----------------|--------------------|-----------------------|
|          | Co MO           | Co MO + pCSKA Wnt8 | Uch37 MO + pCSKA Wnt8 | Co MO           | Co MO + pCSKA Wnt8 | Uch37 MO + pCSKA Wnt8 | Co MO           | Co MO + pCSKA Wnt8 | Uch37 MO + pCSKA Wnt8 |
| N        | 30              | 42                 | 51                    | 29              | 37                 | 34                    | 30              | 33                 | 31                    |
| Normal   | 30              | 7                  | 4                     | 29              | 10                 | 6                     | 30              | 13                 | 0                     |
| Promoted | 0               | 35                 | 6                     | 0               | 27                 | 9                     | 0               | 20                 | 11                    |
| Reduced  | 0               | 0                  | 41                    | 0               | 0                  | 20                    | 0               | 0                  | 20                    |

  

| Xpo      | 1 <sup>st</sup> |                    |                       | 2 <sup>nd</sup> |                    |                       | 3 <sup>rd</sup> |                    |                       |
|----------|-----------------|--------------------|-----------------------|-----------------|--------------------|-----------------------|-----------------|--------------------|-----------------------|
|          | Co MO           | Co MO + pCSKA Wnt8 | Uch37 MO + pCSKA Wnt8 | Co MO           | Co MO + pCSKA Wnt8 | Uch37 MO + pCSKA Wnt8 | Co MO           | Co MO + pCSKA Wnt8 | Uch37 MO + pCSKA Wnt8 |
| N        | 30              | 34                 | 42                    | 26              | 30                 | 37                    | 30              | 34                 | 29                    |
| Normal   | 30              | 6                  | 10                    | 26              | 10                 | 0                     | 30              | 16                 | 1                     |
| Promoted | 0               | 28                 | 2                     | 0               | 20                 | 12                    | 0               | 18                 | 0                     |
| Reduced  | 0               | 0                  | 30                    | 0               | 0                  | 25                    | 0               | 0                  | 28                    |

**Figure S1 Uch37 is highly conserved in vertebrate species including human, mouse and *Xenopus*.** Comparison of Uch37 peptides across vertebrate species. The most conserved residues are indicated by the shaded background. Distinct domains are indicated with colored lines (red, catalytic domain; blue, C-terminal extension).

**Figure S2 Embryonic expression of Uch37.** (a) Expression of Uch37 in *Xenopus* embryo was analyzed by RT-PCR. ODC, ornithine decarboxylase loading control; (-), -RT; egg, unfertilized; St, Nieuwkoop and Faber (NF) developmental stage. (b) Spatial expression of Uch37 from cleavage to gastrula stage. Red box indicates the magnified mesoderm region. (c) Expression of Uch37 in various dissected tissues at stage 10.5. WE, whole embryo; AC, animal cap; DMZ, dorsal marginal zone; VMZ, ventral marginal zone; Chordin, dorsal marker; Msx1, ventral marker; Xbra, pan-mesodermal marker.

**Figure S3 Phenotype of Uch37 morphant.** (a) Uch37 MO specifically inhibits the translation of C-terminally HA-tagged Uch37 mRNA (1ng), but not MO-resistant Uch37 (Re.Uch37) mRNA (1ng) and human Uch37 mRNA (1ng). Four-cell stage embryos were injected in animal blastomeres with indicated reagents. Embryos were cultured to stage 10.5 and then subjected to western blotting. (b) Phenotypes of Uch37-depleted embryos. Embryos were injected at the four-cell stage with the indicated reagents (40 ng Co MO; 40 ng Uch37 MO; 2ng Re.Uch37) ventrally (b, left) or dorsally (b, right) and cultured to tadpole stage. (c, d) Morphant phenotypes were tabulated.

**Figure S4 Uch37 specifically regulates Wnt signaling.** (a-d) RT-PCR analysis using animal cap explants. Co MO (20ng) or Uch37 MO (20ng) were respectively or co-

injected with indicated mRNAs encoding Wnt8 (10pg and 20pg), BMP4 (50pg and 100pg), Xnr1 (50pg and 100pg), or eFGF (100pg and 200pg) in animal blastomeres of four-cell stage embryo. Animal cap explants were dissected at stage 9 and cultured until stage 11. siamois, Wnt-target gene (a); Sizzled, Bmp4-target gene (b); Xbra, target gene of Xnr1 (c) and eFGF (d). (e) Short hairpin RNA (shRNA) of Uch37 efficiently reduced levels of Uch37 protein in HepG2 cells. (f) TOPflash assay in HepG2 cells. Reporter constructs were transfected alone or co-transfected with constitutively active LRP6 (LRP6 $\Delta$ N) into stable cells (sh Control and sh Uch37). 48h after transfection, luciferase activity was measured. (g) qPCR analysis for the expression of Wnt-target genes (c-myc and cyclinD1) in stable HepG2 cells (sh Control or sh Uch37) treated with or without LiCl (25mM). The quantities of indicated mRNA were normalized by  $\beta$ -actin. Data represent average values from three independent experiments performed. Error bars indicate standard deviations of triplicate. \*,  $p < 0.005$ ; \*\*,  $p < 0.001$  (two-tailed Student's ttest).

**Figure S5 Uch37 promotes Wnt signaling downstream of  $\beta$ -catenin destruction complex.** (a) Result of axis duplication assay in Fig 1g. (b, c) RT-PCR analysis using animal cap explants. Embryos were animally injected at four-cell stage. Animal cap explants were isolated at stage 9 and cultured until stage 11. Injected reagents are as follows, Co MO (20ng), Uch37 MO (20ng), myc-Dvl2 mRNA (200pg),  $\beta$ -catenin mRNA (25pg), Re.Uch37 (1ng). (d) Western blot analysis using animal cap explants. Embryos were animally injected at two-cell stage. Animal cap explants were dissected at stage 9 and cultured until stage 11. Injected reagents are as follows, Co MO (40ng), Uch37 MO (40ng), Wnt8 mRNA (20pg), myc-Uch37 mRNA (1ng).

**Figure S6 Uch37 interacts with Tcf7 in nucleus of *Xenopus* gastrula embryo.**

(a) Fractionated lysates from *Xenopus* gastrula embryos were used as expression input for Co-IP analysis in Fig 1A. (b) Uch37 is co-localized with Tcf7 in nucleus. Four-cell stage embryos were animally co-injected with HA-Uch37 (1 ng) and myc-Tcf7 (50pg). Animal cap explants were isolated at stage 10 and fixed with 4% paraformaldehyde for 2h. HA-Uch37 and myc-Tcf7 were immunostained with anti-HA (mouse, santacruz; 2<sup>nd</sup> antibody, Alexa-488, invitrogen) and anti-myc antibodies (rabbit santacruz; 2<sup>nd</sup> antibody, Alexa-594, invitrogen). Scale bar (white line) indicates 50µm. (c) Co-IP assay using HEK293FT cells, HA-Uch37 and indicated myc-tagged truncated mutants of Tcf7 were transfected. Cell lysates were immunoprecipitated with anti-myc antibody. Truncated mutants of Tcf7 are depicted on the left.

**Figure S7 Uch37 is not involved in stabilization of Tcf7 protein.** (a) *In vivo* ubiquitination assay using HEK293FT cells. Ectopically expressed HA-Uch37 reduced both K48-and K63-mediated polyubiquitin chains from Tcf7. (b) Western blot analysis. Embryos were animally injected at two-cell stage with indicated amount of mRNAs. Animal cap explants were isolated at stage 9 and cultured until stage 11, and then subjected to immunoblotting.

**Figure S8 Uch37 MO specifically blocks Tcf7-mediated Wnt activity and Uch37 is required for Tcf7 binding to promoter of Vent2.** (a) Axis duplication assay. Four-cell stage embryos were injected in one ventrovegetal blastomere with indicated

reagents (400pg Tcf7 mRNA; 400pg Lef1; 40ng Co MO; 40ng Uch37 MO). (b) Quantified result of a. (c) ChIP assay using *Xenopus* embryos (stage 11). 70 embryos were injected at two-cell stage as indicated (25pg myc-Tcf7 mRNA; 1ng wild type of Uch37 (WT); 1ng catalytically inactive Uch37 (IN); 40ng Co MO; 40ng Uch37 MO). Lysates were precipitated with anti-myc antibody. Precipitated Wnt target DNAs were analyzed by PCR. EF1 $\alpha$  was used as a control for specificity.

**Figure S9-S12 Full-length images of gels and blots from the main figures.**
